# Supplementary material
Source: Elsevier journal article supplement (https://www.sciencedirect.com/science/article/pii/S1698698916000084)
Supplement: mmc1 [file S1698698916000084:mmc1.docx]

**Cuadro Anexo 1. Sociedades de la Muestra en 1932 (Capital social en millones de Pta. de 1932)**

| Nombre | Domicilio Social | Fecha de Constitución | ISCAEA | Capital Social | Activo total |
| --- | --- | --- | --- | --- | --- |
| Sociedad de Aguas Potables y Mejoras de Valencia | Valencia | 1890 | Capturación, depuración y distribución de aguas | 12,50 | 53,746 |
| Conducción de aguas de Arteta, S.a. | Pamplona | 1893 | Capturación, depuración y distribución de aguas | 4,35 | 6,457 |
| Aguas y Balneario de Cestona | Cestona | 1901 | Capturación, depuración y distribución de aguas | 4,00 | 8,222 |
| Sociedad General de Aguas de Barcelona | Barcelona | 1882 | Capturación, depuración y distribución de aguas | 40,00 | 125,243 |
| S.A. Abastecimiento de Aguas de Ceuta | Bilbao | 1911 | Capturación, depuración y distribución de aguas | 4,00 | 4,394 |
| Aguas de Panticosa, S.A. | Madrid | 1899 | Capturación, depuración y distribución de aguas | 3,50 | 4,267 |
| Compañía de Aguas de Burgos | Burgos | 1889 | Capturación, depuración y distribución de aguas | 2,50 | 5,546 |
| Empresa de aguas potables de Córdoba | Córdoba | 1891 | Capturación, depuración y distribución de aguas | 0,73 | 1,991 |
| Aguas de la Coruña, S. A. | Coruña | 1903 | Capturación, depuración y distribución de aguas | 2,50 | 7,735 |
| S.A. para el abastecimiento de aguas de Santander | Santander | 1881 | Capturación, depuración y distribución de aguas | 6,19 | 8,038 |
| Sociedad Valenciana de Riego del Júcar | Valencia | 1918 | Capturación, depuración y distribución de aguas | s.d. | s.d. |
| S.A. de Abastecimiento de Aguas Potables de Jerez | Jerez | 1871 | Capturación, depuración y distribución de aguas | 6,15 | 7,885 |
| Compañía Barcelonesa de Electricidad | Barcelona | 1894 | Producción, transporte y distribución de energía eléctrica | 30,50 | 74,441 |
| Catalana de Gas y Electricidad | Barcelona | 1843 | Producción, transporte y distribución de energía eléctrica | 71,75 | 325,419 |
| Cooperativa de Electricidad, S.A. | Vitoria | 1905 | Producción, transporte y distribución de energía eléctrica | 2,04 | 3,687 |
| Fábricas Coruñesas de Gas y Electricidad | Coruña | 1918 | Producción, transporte y distribución de energía eléctrica | 9,00 | 37,920 |
| Electra del Cabriel | Utiel | 1901 | Producción, transporte y distribución de energía eléctrica | 0,70 | 1,335 |
| Electra del Lima | Madrid | 1908 | Producción, transporte y distribución de energía eléctrica | 10,00 | 50,219 |
| Electra de Pamplona | Pamplona | 1908 | Producción, transporte y distribución de energía eléctrica | 3,50 | 6,658 |
| Electra del Viesgo | Bilbao | 1906 | Producción, transporte y distribución de energía eléctrica | 51,25 | 145,939 |
| Electra Hidráulica Alavesa | Vitoria | 1897 | Producción, transporte y distribución de energía eléctrica | 1,75 | 2,782 |
| Cooperativa Electra Madrid | Madrid | 1910 | Producción, transporte y distribución de energía eléctrica | 40,59 | 66,836 |
| Electra Popular Vallisoletana | Valladolid | 1906 | Producción, transporte y distribución de energía eléctrica | 8,97 | 20,218 |
| Electra de Puente-Marín | Pamplona | 1918 | Producción, transporte y distribución de energía eléctrica | 2,30 | 3,805 |
| Electra de Recajo | Logroño | 1895 | Producción, transporte y distribución de energía eléctrica | 2,80 | 4,422 |
| Eléctrica Centro de España | Madrid | 1927 | Producción, transporte y distribución de energía eléctrica | 6,00 | 7,003 |
| Eléctrica de Guadalajara | Madrid | 1896 | Producción, transporte y distribución de energía eléctrica | 1,10 | 1,802 |
| Unión Eléctrica Madrileña | Madrid | 1912 | Producción, transporte y distribución de energía eléctrica | 65,00 | 180,334 |
| Sociedad Eléctrica Malagueña | Málaga | 1920 | Producción, transporte y distribución de energía eléctrica | 3,00 | 10,903 |
| Compañía Eléctrica de San Sebastián | San Sebastián | 1890 | Producción, transporte y distribución de energía eléctrica | 2,00 | 2,420 |
| Eléctrica del Urumea | San Sebastián | 1898 | Producción, transporte y distribución de energía eléctrica | 1,50 | 4,551 |
| Unión Eléctrica Vizcaína | Bilbao | 1908 | Producción, transporte y distribución de energía eléctrica | 30,75 | 41,960 |
| E. Reunidas de Zaragoza | Zaragoza | 1904 | Producción, transporte y distribución de energía eléctrica | 32,00 | 46,487 |
| Compañía General de Electricidad de Granada | Granada | 1892 | Producción, transporte y distribución de energía eléctrica | 9,87 | 26,619 |
| Electricista Toledana | Madrid | 1920 | Producción, transporte y distribución de energía eléctrica | 8,25 | 9,007 |
| Energía Eléctrica de Cataluña | Barcelona | 1911 | Producción, transporte y distribución de energía eléctrica | 50,00 | 166,684 |
| FF. M.M. Del Valle Lecrín | Madrid | 1921 | Producción, transporte y distribución de energía eléctrica | 14,00 | 54,632 |
| Gas Madrid, S.A. | Madrid | 1921 | Fabricación de gas; distribución por canalizaciones de combustibles gaseosos | 16,30 | 43,875 |
| Gas Reusense | Reus | 1854 | Fabricación de gas; distribución por canalizaciones de combustibles gaseosos | 0,63 | 1,597 |
| Hidráulica Moncayo | Pamplona | 1909 | Producción, transporte y distribución de energía eléctrica | 8,49 | 16,258 |
| Sociedad Hidráulica Santillana | Madrid | 1905 | Producción, transporte y distribución de energía eléctrica | 18,11 | 48,328 |
| Hidroeléctrica de Buenamesón, S. A. | Madrid | 1913 | Producción, transporte y distribución de energía eléctrica | 5,00 | 5,912 |
| Sociedad Hidroeléctrica del Chorro | Málaga | 1903 | Producción, transporte y distribución de energía eléctrica | 12,75 | 32,673 |
| S. Hidroeléctrica Española | Madrid | 1907 | Producción, transporte y distribución de energía eléctrica | 102,50 | 344,955 |
| Hidroeléctrica Ibérica S.A. | Bilbao | 1901 | Producción, transporte y distribución de energía eléctrica | 83,54 | 174,288 |
| Compañía Hispano-Americana de Electricidad, S. A. | Madrid | 1920 | Producción, transporte y distribución de energía eléctrica | 260,00 | 953,970 |
| El Irati, S.A. | Pamplona | 1907 | Producción, transporte y distribución de energía eléctrica | 12,50 | 27,352 |
| Cía. Anónima Mengemor | Madrid | 1904 | Producción, transporte y distribución de energía eléctrica | 52,57 | 69,824 |
| Molinos del Segura en Archena, S. A. | Murcia | 1922 | Producción, transporte y distribución de energía eléctrica | 1,92 | 2,930 |
| Compañía Popular de Gas y Electricidad | Gijón | 1900 | Producción, transporte y distribución de energía eléctrica | 10,00 | 11,595 |
| El Porvenir de Burgos | Burgos | 1905 | Producción, transporte y distribución de energía eléctrica | 1,13 | 1,931 |
| El Porvenir de Zamora, S. A. | Zamora | 1899 | Producción, transporte y distribución de energía eléctrica | 4,61 | 6,652 |
| Compañía Sevillana de Electricidad | Sevilla | 1894 | Producción, transporte y distribución de energía eléctrica | 75,00 | 192,543 |
| Teledinámica Turolense, S. A. | Madrid | 1913 | Producción, transporte y distribución de energía eléctrica | 2,00 | 3,944 |
| CTNE | Madrid | 1924 | Servicios de Telecomunicaciones | 500,00 | 903,011 |
| Volta, S. A. | Valencia | 1913 | Producción, transporte y distribución de energía eléctrica | 13,50 | 40,241 |
| La Energía Eléctrica S. A. | Granada | 1900 | Producción, transporte y distribución de energía eléctrica | 0,60 | 1,103 |
| Canalización y Fuerzas del Guadalquivir, S. A. | Madrid | 1924 | Producción, transporte y distribución de energía eléctrica | 30,00 | 50,188 |
| Compañía de Riegos de Levante, S. A. | Alicante | 1918 | Producción, transporte y distribución de energía eléctrica | 25,00 | 76,957 |
| S.A. Cía. Navarra Abonos Químicos | Pamplona | 1908 | Industria Química | 5,11 | 13,849 |
| El Águila, S.A. | Madrid | 1900 | Industria de Alimentos y Bebidas | 12,00 | 18,557 |
| Ajuria, S. A. | Vitoria | 1927 | Industrias Transformadoras de metales, excepto maquinaria y material de transporte | 12,00 | 19,818 |
| Unión Alcoholera Española, S. A. | Madrid | 1904 | Industria de Alimentos y Bebidas | 6,25 | 32,962 |
| Cía. Gral. de Asfaltos y Portland Asland | Barcelona | 1901 | Industria de productos minerales no metálicos | 24,81 | 88,016 |
| Sdad. Gral. Azucarera de España | Madrid | 1903 | Industria de Alimentos y Bebidas | 87,75 | 422,317 |
| Azucarera Nueva Rosario, S. A. | Granada | 1904 | Industria de Alimentos y Bebidas | 4,00 | 14,803 |
| Bodegas Bilbaínas, S. A. | Bilbao | 1901 | Industria de Alimentos y Bebidas | 4,80 | 14,993 |
| Carburos de Teruel, S. A. | Reus | 1914 | Industria Química | 0,52 | 0,602 |
| Cementos Portland, S. A. | Pamplona | 1903 | Industria de productos minerales no metálicos | 16,00 | 25,953 |
| S. Española de Cementos Portland (Hispania) | Madrid | 1909 | Industria de productos minerales no metálicos | 5,50 | 11,943 |
| La Cerámica | Valladolid | 1904 | Industria de productos minerales no metálicos | 4,00 | 5,775 |
| Cervezas de Santander, S. A. | Santander | 1905 | Industria de Alimentos y Bebidas | 5,25 | 10,279 |
| Sociedad Española de Construcciones Electro-Mecánicas | Madrid | 1917 | Fabricación de maquinaria y material eléctrico | 25,00 | 56,864 |
| Sociedad Anónima Cros | Barcelona | 1904 | Industria Química | 80,00 | 210,914 |
| Ebro-Cía. de Azúcares y Alcoholes, S. A. | Madrid | 1911 | Industria de Alimentos y Bebidas | 40,00 | 91,819 |
| La España Industrial, S. A. | Barcelona | 1847 | Industria textil | 9,53 | 22,774 |
| Unión Española de Explosivos | Bilbao | 1896 | Industria Química | 60,00 | 160,937 |
| La Forestal de Urgel | Madrid | 1890 | Industria de la madera y del corcho | 2,05 | 2,259 |
| Cía. Arrendataria de Fósforos | Madrid | 1922 | Industria Química | 16,45 | 33,521 |
| Cía. Anónima Hilaturas Fabra-Coats | Barcelona | 1903 | Industria textil | 4,50 | 101,944 |
| La Hispano-Suiza-Fábrica de Automóviles, S. A. | Barcelona | 1904 | Contrucción y montaje de vehículos automóviles | 10,00 | 51,157 |
| La Ibérica. Fábrica de Galletas y Bizcochos | Rentería | 1886 | Industria de Alimentos y Bebidas | 0,17 | 1,332 |
| La industria | Gijón | 1915 | Industrias de productos minerales no metálicos | s.d. | s.d. |
| Sociedad Industrial Castellana | Valladolid | 1898 | Industria de Alimentos y Bebidas | 14,70 | 36,777 |
| La Industrial Harinera | Reus | 1855 | Industria de Alimentos y Bebidas | 0,50 | 0,824 |
| La Industrial Química de Zaragoza, S. A. | Zaragoza | 1899 | Industria Química | 18,16 | 33,778 |
| Cía. de Industrias Agrícolas | Barcelona | 1911 | Industria de Alimentos y Bebidas | 35,63 | 120,799 |
| S.A. Lizariturry y Rezola | San Sebastián | 1923 | Fabricación de maquinaria y material eléctrico | 7,50 | 20,088 |
| Material para Ferrocarriles y Construcciones, S. A. | Barcelona | 1881 | Contrucción de otro material de transporte | 5,75 | 39,025 |
| Material Móvil y Construcciones, Antiguos Talleres de Carde y Escoriaza | Zaragoza | 1920 | Contrucción de otro material de transporte | 6,00 | 10,963 |
| La Montañesa, S. A. | Zaragoza | 1900 | Industria de papel y artículos de papel | s.d. | s.d. |
| Sociedad Navarra de Industrias, S. A. | Pamplona | 1916 | Industria Química | 2,50 | 5,670 |
| La Papelera Española | Bilbao | 1901 | Industria de papel y artículos de papel | 50,00 | 90,356 |
| Compañía Arrendataria del Monopolio de Petróleos | Madrid | 1927 | Fabricación de coque, refino de petróleo | 195,00 | 418,092 |
| Pickman, S. A. Fábrica de loza en la Cartuja de Sevilla | Sevilla | 1899 | Industrias de productos minerales no metálicos | 1,77 | s.d. |
| Cía. Arrendataria de Tabacos | Madrid | 1887 | Industria del tabaco | 60,00 | 468,402 |
| Cía. Gral. de Tabacos de Filipinas | Barcelona | 1881 | Industria del tabaco | 22,50 | 193,009 |
| Gran Tejería Mecánica Pamplonesa | Pamplona | 1896 | Industria de productos minerales no metálicos | 0,44 | 0,674 |
| S. A. Tudela Veguin | Oviedo | 1898 | Industria de productos minerales no metálicos | 3,50 | 10,974 |
| La Veneciana, S. A. | Zaragoza | 1925 | Industria de productos minerales no metálicos | 9,00 | 13,897 |
| Unión Vidriera de España | Madrid | 1908 | Industria de productos minerales no metálicos | 6,26 | 14,939 |
| Cía. Cooperativa Vinícola del Norte de España | Bilbao | 1882 | Industria de Alimentos y Bebidas | 1,20 | 1,839 |
| La Zaragozana, S.A. | Zaragoza | 1900 | Industria de Alimentos y Bebidas | 0,53 | 3,317 |
| Valle Ballina y Fernández | Villaviciosa | 1900 | Industria de Alimentos y Bebidas | 3,00 | 3,569 |
| Portland Valderrivas, C.M.A. | Madrid | 1923 | Industrias de productos minerales no metálicos | 14,98 | 20,769 |
| Sociedad de Tejidos de Lino de Rentería | Rentería | 1845 | Industria Textil | s.d. | s.d. |
| S.A. Altos Hornos de Vizcaya | Bilbao | 1902 | Producción y primera Transformación de los Metales | 125,00 | 291,382 |
| Sociedad Metalúrgica Duro-Felguera | Madrid | 1900 | Producción y primera Transformación de los Metales | 77,48 | 114,624 |
| Compañía Española de las Minas del Rif | Madrid | 1908 | Minería de los minerales metálicos | 24,08 | 141,886 |
| Sociedad Española de Construcciones Babcock & Wilcox | Bilbao | 1918 | Industrias Transformadoras de metales, excepto maquinaria y material de transporte | 20,00 | 48,415 |
| Compañía Anónima "Basconia" | Bilbao | 1892 | Industrias Transformadoras de metales, excepto maquinaria y material de transporte | 14,00 | 74,975 |
| Unión Cerrajera, S. A. | Mondragón | 1906 | Industrias Transformadoras de metales, excepto maquinaria y material de transporte | 15,00 | 34,861 |
| Sociedad Hullera Española | Barcelona | 1892 | Minería del carbón, lignito y turba | 20,00 | 88,762 |
| Sociedad Hullera Vasco-Leonesa | Bilbao | 1893 | Minería del carbón, lignito y turba | 6,00 | 14,628 |
| Minero-Siderúrgica de Ponferrada, Cía. | Madrid | 1918 | Minería del carbón, lignito y turba | 15,00 | 52,089 |
| Minas y ferrocarril de Utrillas,  S. A. | Zaragoza | 1909 | Minería del carbón, lignito y turba | 11,24 | 26,207 |
| Compañía Siderúrgica del Mediterráneo | Bilbao | 1918 | Producción y primera Transformación de los Metales | 65,00 | 149,703 |
| La Maquinista Terrestre y Marítima | Barcelona | 1855 | Construcción de otro material de transporte | 19,05 | 45,131 |
| Echevarría, S.A. | Bilbao | 1920 | Producción y primera Transformación de los Metales | 30,00 | 55,726 |
| S.A. Hulleras de Turón | Bilbao | 1890 | Minería del carbón, lignito y turba | 4,00 | 26,214 |
| Aurrerá, S. A. | Bilbao | 1890 | Producción y primera Transformación de los Metales | 2,93 | 8,324 |
| Talleres de Fundición Gabilondo, C. A. | Valladolid | 1904 | Industrias Transformadoras de metales, excepto maquinaria y material de transporte | 0,50 | 0,739 |
| Compañía Minero Metalúrgica "Los Guindos" | Madrid | 1920 | Producción y primera Transformación de los Metales | 35,70 | 51,923 |
| Talleres de Deusto, S. A. | Bilbao | 1892 | Industrias Transformadoras de metales, excepto maquinaria y material de transporte | 2,00 | 5,955 |
| Nueva Montaña, S. A. del hierro y del acero de Santander | Santander | 1899 | Producción y primera Transformación de los Metales | 10,00 | 27,425 |
| Tubos Forjados | Bilbao | 1892 | Industrias Transformadoras de metales, excepto maquinaria y material de transporte | 0,60 | 4,659 |
| Los tranvías de Zaragoza, SA | San Sebastián | 1886 | Servicios de transporte terrestre | 3,00 | 13,341 |
| Sdad. Gral. de ferrocarriles Vasco-Asturiana | Oviedo | 1899 | Servicios de transporte terrestre | 14,79 | 45,364 |
| Compañía de los FFCC Vascongados | Bilbao | 1906 | Servicios de transporte terrestre | 20,00 | 91,381 |
| Cía. Auxiliar de Ferrocarriles | Beasain | 1917 | Construcción de otro material de transporte | 20,09 | 104,384 |
| Cía. del Ferrocarril de Langreo en Asturias | Madrid | 1847 | Servicios de transporte terrestre | 12,35 | 41,885 |
| Cía. del Ferrocarril Central de Aragón | Madrid | 1895 | Servicios de transporte terrestre | 20,00 | 263,068 |
| Cía. De los FF.CC. económicos de Asturias | Oviedo | 1887 | Servicios de transporte terrestre | 11,50 | 24,462 |
| Cía. de los FF.CC. de la Robla | Bilbao | 1890 | Servicios de transporte terrestre | 32,50 | 66,754 |
| Compañía Madrileña de Tranvías | Madrid | 1920 | Servicios de transporte terrestre | 70,00 | 130,863 |
| Cía. de los FF.CC. de Madrid, Zaragoza y Alicante (MZA) | Madrid | 1856 | Servicios de transporte terrestre | 236,00 | 2.377,303 |
| Cía. de los FF.CC. de Medina del Campo a Zamora y de Orense a Vigo | Barcelona | 1862 | Servicios de transporte terrestre | 54,77 | 89,064 |
| Cía. Metropolitano Alfonso XIII | Madrid | 1917 | Servicios de transporte terrestre | 58,00 | 137,569 |
| Cía. de los caminos de Hierro del Norte de España | Madrid | 1858 | Servicios de transporte terrestre | 245,10 | 2.917,325 |
| Cía. de los FF.CC. de Peñarroya y Puertollano | Madrid | 1923 | Servicios de transporte terrestre | 14,00 | 42,782 |
| Ferrocarril Secundario de Sádaba a Gallur, con garantía de interés por el Estado | Zaragoza | 1912 | Servicios de transporte terrestre | 2,00 | 7,866 |
| Cía. De los FF.CC. de Santander a Bilbao | Bilbao | 1894 | Servicios de transporte terrestre | 16,62 | 60,279 |
| Tranvía de Barcelona, Ensanche y Gracia, S. A. | Barcelona | 1890 | Servicios de transporte terrestre | 3,40 | 8,830 |
| Tranvía de Cádiz a San Fernando y Carraca, S. A. | San Fernando | 1904 | Servicios de transporte terrestre | 2,50 | 5,305 |
| Compañía del Tranvía de San Sebastián | San Sebastián | 1886 | Servicios de transporte terrestre | 2,50 | 9,004 |
| Tranvías Eléctricos de Granada, S. A. | Granada | 1903 | Servicios de transporte terrestre | 23,00 | 60,009 |
| Cía. de Tranvías y Ferrocarriles de Valencia | Valencia | 1917 | Servicios de transporte terrestre | 15,00 | 35,576 |
| Tranvías de Sevilla, S.A. | Sevilla | 1921 | Servicios de transporte terrestre | 7,00 | 23,294 |
| Cía del Ferrocarril del Cantábrico | Santander | 1890 | Servicios de transporte terrestre | 6,51 | 27,450 |
| Tranvía Eléctrico de Bilbao a Durango a Arratia | Bilbao | 1899 | Servicios de transporte terrestre | 2,15 | 8,093 |
| Cía. de FF.CC. de Bilbao a Portugalete | Bilbao | 1884 | Servicios de transporte terrestre | 5,00 | s.d. |
| Compañía General de Tranvías, S. A. | Barcelona | 1877 | Servicios de transporte terrestre | 5,94 | 40,269 |
| Sociedad Española de Construcción Naval | Madrid | 1908 | Servicios de Transporte marítimos y fluviales | 55,00 | 675,848 |
| Compañía Euskalduna de Construcción y reparación de buques | Bilbao | 1900 | Construcción de otro material de transporte | 8,00 | 31,096 |
| Cía. Marítima del Nervión | Bilbao | 1907 | Servicios de Transporte marítimos y fluviales | 5,00 | 17,073 |
| Cía. Naviera Vascongada | Bilbao | 1899 | Servicios de Transporte marítimos y fluviales | 7,33 | 12,960 |
| Cía. de Remolcadores Ibaizabal | Bilbao | 1906 | Servicios de Transporte marítimos y fluviales | 0,58 | 2,708 |
| Sota y Aznar | Bilbao | 1906 | Servicios de Transporte marítimos y fluviales | 40,00 | 136,564 |
| Consorcio Nacional Almadrabero | Madrid | 1929 | Industria de Alimentos y Bebidas | 24,27 | 41,890 |
| Compañía Transmediterránea | Barcelona | 1916 | Servicios de Transporte marítimos y fluviales | 50,00 | 194,427 |
| "Aurora", Cía. Anónima de Seguros | Bilbao | 1900 | Seguros y Fondos de Pensiones | 5,40 | 34,841 |
| Fomento de Obras y Construcciones | Barcelona | 1900 | Actividades Inmobiliarias | 12,50 | 81,657 |
| Hotel Ritz-Madrid | Madrid | 1908 | Otros Sevicios | 3,16 | 6,788 |
| Instituto Pedro Mata | Reus | 1896 | Otros Sevicios | 1,00 | 2,703 |
| Construcciones y Pavimentos, S.A. | Barcelona | 1911 | Actividades Inmobiliarias | 10,00 | 60,871 |
| Compañía Urbanizadora Metropolitana | Madrid | 1918 | Actividades Inmobiliarias | 7,50 | 9,679 |

Fuente: Leg. 3.099, Archivo Histórico Banco de España (AHBE). La clasificación es la misma que emplean Carreras y Tafunell (1993), p.- 145-148.
